1 Heterologous caffeic acid biosynthesis in *Escherichia coli* is  
2 affected by choice of tyrosine ammonia lyase and redox partners  
3 for bacterial Cytochrome P450

4

5 Kristina Haslinger<sup>1</sup> and Kristala L.J. Prather<sup>1</sup>

6

7 <sup>1</sup>Department of Chemical Engineering, Massachusetts Institute of Technology,  
8 Cambridge, USA

9

10 Correspondence should be directed to [kljp@mit.edu](mailto:kljp@mit.edu)

## 11 Abstract

12 **Background:** Caffeic acid is industrially recognized for its antioxidant activity and  
13 therefore its potential to be used as an anti-inflammatory, anticancer, antiviral,  
14 antidiabetic and antidepressive agent. It is traditionally isolated from lignified plant  
15 material under energy-intensive and harsh chemical extraction conditions. However,  
16 over the last decade bottom-up biosynthesis approaches in microbial cell factories have  
17 been established, that have the potential to allow for a more tailored and sustainable  
18 production. One of these approaches has been implemented in *Escherichia coli* and  
19 only requires a two-step conversion of supplemented L-tyrosine by the actions of a  
20 tyrosine ammonia lyase and a bacterial Cytochrome P450 monooxygenase. Although  
21 the feeding of intermediates demonstrated the great potential of this combination of  
22 heterologous enzymes compared to others, no *de novo* synthesis of caffeic acid from  
23 glucose has been achieved utilizing the bacterial Cytochrome P450 thus far.

24 **Results:** The herein described work aimed at improving the efficiency of this two-step  
25 conversion in order to establish *de novo* caffeic acid formation from glucose. We  
26 implemented alternative tyrosine ammonia lyases that were reported to display superior  
27 substrate binding affinity and selectivity, and increased the efficiency of the Cytochrome  
28 P450 by altering the electron-donating redox system. With this strategy we were able to  
29 achieve final titers of more than 300  $\mu\text{M}$  or 47 mg/L caffeic acid over 96 h in an  
30 otherwise wild type *E. coli* MG1655(DE3) strain with glucose as the only carbon source.  
31 We observed that the choice and gene dose of the redox system strongly influenced the  
32 Cytochrome P450 catalysis. In addition, we were successful in applying a tethering

33 strategy that rendered even an initially unproductive Cytochrome P450/ redox system  
34 combination productive.

35 **Conclusions:** The caffeic acid titer achieved in this study is about 25% higher than  
36 titers reported for other heterologous caffeic acid pathways in wildtype *E. coli* without L-  
37 tyrosine supplementation. The tethering strategy applied to the Cytochrome P450  
38 appears to be particularly useful for non-natural Cytochrome P450/redox partner  
39 combinations and could be useful for other recombinant pathways utilizing bacterial  
40 Cytochromes P450.

#### 41 [Keywords](#)

42 Caffeic acid, Cytochrome P450, tethering, PUPPET, recombinant pathway

#### 43 [Background](#)

44 Caffeic acid is widely recognized for its medicinal potential due to its antidepressive [1],  
45 antihyperglycemic [2], anti-inflammatory [3], antioxidant [2, 4], anti-coagulatory [3],  
46 anticancer [5] and antiviral [6] properties. It is readily produced in plants as a key  
47 intermediate in phenylpropanoid biosynthesis. In this pathway, phenylalanine is diverted  
48 from primary metabolism by a phenylalanine ammonia lyase associated with the  
49 endoplasmic reticulum and transformed into *trans*-cinnamic acid. Cinnamic acid is  
50 then hydroxylated by the membrane-anchored Cytochrome P450 enzymes cinnamate  
51 4-hydroxylase (C4H) and *p*-coumarate 3-hydroxylase to *p*-coumarate and caffeic acid,  
52 respectively [7, 8]. From there a range of molecules can be produced that serve as  
53 lignin building blocks or precursors for secondary metabolites such as tannins,  
54 (iso)flavonoids, anthocyanins, stilbenes and coumarins [9]. All of these compounds  
55 have high market value but are difficult to isolate because they are of low natural

56 abundance (e.g. stilbenes and coumarins), or challenging to extract (e.g. lignin-derived  
57 aromatics) [10]. Therefore, over the last decade various strategies have been  
58 developed to implement biosynthetic pathways in microbial cell factories that promise  
59 their tailored biosynthesis in a sustainable manner. Recent examples are the production  
60 of stilbenoids and flavonoids in *Corynebacterium glutamicum* [11, 12], and curcumin  
61 [13, 14] and caffeic acid [14–24] in *Escherichia coli*. For the biosynthesis of *p*-coumaric  
62 acid in *E. coli*, it was found that using L-tyrosine as a pathway precursor was superior  
63 over phenylalanine [25], since activity of the plant Cytochrome P450 enzyme C4H could  
64 not be reconstituted as of recently [26]. Based on this finding, two major strategies have  
65 been devised to produce caffeic acid that employ microbial tyrosine ammonia lyases  
66 (TAL) to generate *p*-coumaric acid followed by either (1) a flavin-dependent HpaBC-type  
67 oxidoreductase complex (4-hydroxyphenylacetate 3-hydroxylase, PFAM PF03241) from  
68 *Saccharothrix espanaensis* [14–18], *E. coli* [19–21], *Thermus thermophilus* HB8 [20] or  
69 *Pseudomonas aeruginosa* [22, 23], or (2) a bacterial cytochrome P450 enzyme  
70 CYP199A2 F185L from *Rhodopseudomonas palustris* [14, 18, 24]. In all of these  
71 studies it became evident that the caffeic titers are rather low unless L-tyrosine or *p*-  
72 coumaric acid are added to the growth media, or the aromatic amino acid pathway is  
73 engineered to increase intracellular L-tyrosine levels. For the pathways utilizing HpaBC-  
74 type oxidoreductases, the highest titer reported for *de novo* synthesis in wild-type *E. coli*  
75 to date is 42 mg/L (*S. espanaensis* TAL and HpaBC) [17]. However, to our knowledge  
76 no *de novo* synthesis has been reported for pathways utilizing CYP199A2 F185L.  
77 In this study, we established *de novo* biosynthesis of caffeic acid from glucose through  
78 the actions of TAL and CYP199A2 F185L  $\Delta 7$ . In order to achieve this goal, we tested

79 TALs from three different organisms and explored strategies to enhance the activity of  
80 CYP199A2 F185L NΔ7. We found that driving the binding equilibrium of the electron-  
81 donating redox partners to CYP199A2 F185L NΔ7 towards the bound state improves  
82 pathway titers and enabled us to produce ~47 mg/L caffeic acid from glucose in wildtype  
83 *E. coli* MG1655(DE3). This titer is slightly higher than the titers reported for the HpaBC-  
84 based pathways in wildtype *E. coli* with glucose as the only carbon source [17, 19].

## 85 Results

86 In an earlier study Rodrigues et al. demonstrated the two-step conversion of 3 mM L-  
87 tyrosine to caffeic acid in *E. coli* MG1655(DE3) expressing the enzymes RgTAL and  
88 CYP199A2 F185L NΔ7 with redox partners, without reporting *de novo* production of  
89 caffeic acid from glucose (Figure 1) [18]. In this study we set out to improve these  
90 enzymatic steps to establish caffeic acid production from glucose without supplementing  
91 L-tyrosine. When examining the two-step conversion more closely, we determined that  
92 both pathway steps needed improvement. First, the efficiency of the committed step, the  
93 conversion of L-tyrosine to *p*-coumaric acid, determines how much L-tyrosine is  
94 withdrawn from primary metabolism and fed into the pathway. Therefore, we  
95 hypothesized that TAL variants with higher selectivity and affinity for L-tyrosine would  
96 improve pathway flux. Second, the hydroxylation of *p*-coumaric acid to caffeic acid  
97 catalyzed by CYP199A2 F185L NΔ7 appears to be a bottleneck in the pathway, since *p*-  
98 coumaric acid accumulates in the fermentation [18]. This accumulation is thought to be  
99 detrimental because *p*-coumaric acid has been shown to inhibit TAL activity and to be  
100 cytotoxic [27, 28]. Since a common problem with Cytochrome P450 catalyzed reactions  
101 is the protein-protein interaction with redox partners, which is strictly required for

102 electron transfer and substrate turnover [29], we hypothesized that driving the assembly  
103 of the redox complex would lead to higher product titers.

104 To improve the first pathway step, we selected two homologous tyrosine ammonia  
105 lyases with supposedly superior characteristics compared to RgTAL, namely a stronger  
106 selectivity for L-tyrosine over L-phenylalanine, higher substrate affinity ( $K_m$ ) and superior  
107 catalytic efficiency ( $k_{cat}/K_m$ ) (Supporting Information Table S1) [30]. We chose FjTAL  
108 from *Flavobacterium johnsoniae* and SeSam8 from *Saccharothrix espanaensis* and  
109 obtained the synthetic genes codon-optimized for expression in *E. coli*. In a first pass,  
110 utilizing these two TALs in the same three plasmid expression system as used by  
111 Rodrigues et al., and providing glucose as the only carbon source, we observed  
112 accumulation of caffeic acid 72 h post induction (p. i.). The highest titers of caffeic acid  
113 and *p*-coumaric acid are seen with the FjTAL enzyme (Figure 2A, strain s02). In a  
114 parallel experiment, where 3 mM L-tyrosine was fed in addition to glucose, the final  
115 caffeic acid titers were comparable among the three strains (Figure 2B). This indicates  
116 that all enzymes are able to efficiently route L-tyrosine into the caffeic acid pathway at  
117 high L-tyrosine concentrations, whereas FjTAL outperforms the other enzymes under  
118 low L-tyrosine conditions and is therefore a strong candidate for this pathway.

119 Next, we sought to improve the efficiency of the second pathway step, the hydroxylation  
120 of *p*-coumaric acid to caffeic acid catalyzed by CYP199A2 F185L NΔ7, by enhancing  
121 the efficiency of the electron transfer step from the two redox partner proteins to  
122 CYP199A2 F185L NΔ7. To achieve this goal, we tested three strategies: 1. the use of  
123 alternative redox partners, 2. the tethering of the redox complex by creating genetic  
124 fusions with high-affinity tethering domains, and 3. the supply of extra gene copies

125 coding for one of the redox partners. To facilitate cloning from here on in the study, we  
126 use both multiple cloning sites of the pETDuet vector for the genes encoding redox  
127 enzymes rather than the bicistronic pKVS45 vector (see Tables 1 and 2).

128 For class I Cytochromes P450, two redox partners are required to provide two electrons  
129 from NAD(P)H: an iron-sulfur cluster containing ferredoxin (Fdx) and a flavin-dependent  
130 ferredoxin reductase (FdR) [31]. Rodrigues et al. utilized a redox system composed of  
131 palustrisferredoxin (Pux) and putidaredoxin reductase (PdR), which had been used in the  
132 original characterization of CYP199A2 [32]. This is, however, not the natural redox  
133 system for CYP199A2, since the palustrisferredoxin reductase PuR was only identified and  
134 characterized a few years later [33]. Although the Pux/PdR redox system has been  
135 proven to support substrate turnover, it remained unclear whether the assembly of the  
136 trimeric complex and the respective redox potentials of the proteins supported optimal  
137 electron transfer. Therefore, we decided to test the natural redox system (Pux/PuR)  
138 alongside a well-characterized surrogate redox system (Pdx/PdR). We determined the  
139 caffeic acid titers 72 h p. i. with supplementation of *p*-coumaric acid for three strains  
140 expressing CYP199A2 F185L N $\Delta$ 7 and one of the three respective redox systems  
141 Pux/PdR (hybrid, s04), Pux/PuR (natural, s05), Pdx/PdR (surrogate, s06). We observed  
142 the highest titers for the natural redox system (s05) and no turnover with the full  
143 surrogate system composed of Pdx/PdR (Figure 3A). This suggests that the electron  
144 transfer from ferredoxin to CYP199A2 F185L N $\Delta$ 7 is severely impaired with the  
145 surrogate ferredoxin Pdx, whereas the electron transfer from PdR to Pux in the hybrid  
146 system appears to sufficiently support substrate turnover. The native redox complex  
147 Pux/PuR, however, displays the highest catalytic power and a titer of 1.6 +/- 0.32 mM

148 caffeic acid was observed which corresponds to 53% conversion of the fed *p*-coumaric  
149 acid. These results indicate that the careful choice of redox system is crucial for this  
150 pathway step.

151 With our second strategy, we sought to further improve these redox systems by  
152 generating genetic fusions of the enzymes with the subunits of the heterotrimeric DNA  
153 sliding clamp PCNA (Proliferating Cell Nuclear Antigen) of *Sulfolobus solfataricus* P2  
154 [34]. This PCNA complex has been shown to tolerate the fusion of other genes to the '3  
155 ends (C-termini) [35] of its three subunits, while maintaining their high binding affinity  
156 towards each other: the PCNA1/PCNA2 dimer has a dissociation constant in the low  
157 picomolar range and the PCNA1/PCNA2/PCNA3 trimer in the high nanomolar range  
158 [34]. This fusion strategy has been shown to be highly efficient for the *in vitro*  
159 reconstitution of Cytochrome P450 activity and was termed PUPPET by the inventors  
160 (PCNA-utilized protein complex of P450 and its two electron transfer-related proteins)  
161 [35–40]. To our knowledge, this strategy hasn't been used in whole-cell catalysis to  
162 date. Initially, we tested fusion proteins analogous to the previously described PUPPET  
163 fusions with FdR fused to the C-terminus of PCNA domain 1, Fdx to PCNA2 and the  
164 Cytochrome P450 to PCNA3 (tether design I, strains s07-s09; Figure 3B). When feeding  
165 3 mM *p*-coumaric acid, we observed higher titers of caffeic acid for all tethered redox  
166 systems than compared to the respective free enzymes. The effect was more  
167 pronounced with the hybrid and surrogate systems, where a 6-fold increase in titer was  
168 observed for Pux/PdR (s07) and an 8-fold increase for Pdx/PdR (s09). Overall, the  
169 highest titer was observed with the tethered version of Pux/PdR (s07, titer: 2.3 +/- 0.07  
170 mM). Next, we investigated whether these titers could be further improved by



171 generating a new arrangement of the fusion partners. Based on the published  
172 dissociation constants for the well-studied Cytochrome P450 CYP101A1 and its redox  
173 partners [41, 42], we assumed that the affinity of Fdx to FdR is about 100-fold higher  
174 than the affinity of Fdx to the Cytochrome P450. We hypothesized that the high affinity  
175 interaction between PCNA1 and PCNA2 might be even more beneficial to the low  
176 affinity interaction between the Cytochrome P450 and Fdx than between Fdx and FdR.  
177 Therefore, we generated a second set of fusion genes (tether design II), where  
178 CYP199A2 F185L NΔ7 is fused to PCNA1, Fdx to PCNA2 and FdR to PCNA3, while  
179 maintaining the linker arrangements that had previously been optimized for the  
180 respective elements of the redox complex [39] (s 10-s12, Fig 3C). With these alternative  
181 tethering constructs, the highest final caffeic acid titers were obtained with the surrogate  
182 Pdx/PdR redox system (s10, titer: 2.1 +/- 0.35 mM), while the titers obtained with the  
183 other redox systems were lower than in the previous experiments. This indicates that  
184 the domain arrangements in the second tether design supports the weaker protein-  
185 protein interactions in the surrogate redox complex better than the other tether design,  
186 whereas it disturbs catalysis with the two redox systems that already led to high titers  
187 with free redox partners and tether design I.

188 Next, we tested the best redox partner constructs in the context of the full pathway with  
189 FjTAL as the first pathway enzyme (Figure 3D). We observed the highest caffeic acid  
190 titers with the untethered, natural redox partners (Pux/PuR, s15, titer: 0.14 +/-  
191 0.028 mM). Although strains s07, s08 and s12 had slightly outperformed s05 in the one-  
192 step conversion, the corresponding strains expressing FjTAL (s14, s16, s17,  
193 respectively) yielded lower caffeic acid titers in the two-step recombinant pathway. The

194 cost for expressing the additional tethering domains may offset the positive effects of  
195 the enhanced enzymatic activity. In all of the fermentations, lower final titers of *p*-  
196 coumaric acid are measured than in the initial test of FjTAL (s02), which indicates that  
197 the changes made to the second pathway step allow for an almost complete conversion  
198 to the final product.

199 Lastly, we tested whether additional copies of the palustrisredoxin encoding gene, *pux*,  
200 would further improve the performance of the so far best pathway configuration with  
201 FjTAL and the natural redox partners of CYP199A2 F185L NΔ7 (Pux/PuR redox  
202 system). Therefore, we inserted *pux* into MCS1 of plasmid IR64 pCDFDuet::<sub>6</sub>His-  
203 CYP199A2 F185L NΔ7, yielding plasmid c84 pCDFDuet::<sub>6</sub>His-Pux\_6His-  
204 CYP199A2F185L NΔ7. Based on the supplier's reports (Novagen), the copy numbers of  
205 pETDuet and pCDFDuet are in a similar range so that the incorporation of an additional  
206 gene copy into pCDFDuet should lead to an estimated doubling of the gene dose and  
207 potentially the level of protein expressed. When comparing the strain harboring this set  
208 of plasmids (s18) to the RgTAL control strain (s13) and the strain expressing FjTAL and  
209 Pux/PuR (s15), we observed an increase in caffeic acid titer with full consumption of the  
210 intermediate *p*-coumaric acid (Figure 4A). This indicates that the availability of Pux was  
211 previously insufficient and that a higher expression level of this protein supports better  
212 Cytochrome P450 performance. Despite the improvements in final caffeic acid titer, we  
213 observed an accumulation of *p*-coumaric acid in early fermentation until 48 h p. i. and  
214 then a sharp drop in titer until it is fully converted to caffeic acid at 96 h p. i. (Figure 4B).  
215 This indicates that in early fermentation the first pathway step is still faster than the  
216 second pathway step. In late fermentation, the conversion of *p*-coumaric acid to caffeic

217 acid is faster than the formation of the intermediate, or no additional *p*-coumaric acid is  
218 formed. This could be caused by the lack of available L-tyrosine once the cultures reach  
219 stationary phase, although we did not observe increased titers when spiking the cultures  
220 with 3 mM L-tyrosine at 48 h p. i. (I Figure S1). Therefore, we are inclined to suggest  
221 that the tyrosine ammonia lyase has lost its activity by that time. Potential causes could  
222 be structural instability of the TAL enzyme or its inhibition by the intermediate as  
223 described previously [27]. Overall, with the exchange of RgTAL for FjTAL and the  
224 change of the redox system from Pux/PdR to Pux/PuR with an additional gene copy of  
225 *pux*, we improved this recombinant pathway and were able to produce caffeic acid from  
226 glucose without feeding L-tyrosine. The highest final titer after 96 h of fermentation was  
227 47 mg/L, which is slightly higher than caffeic acid titers achieved with other recombinant  
228 pathways without L-tyrosine supplementation [17, 19]. Furthermore, the improved  
229 pathway is able to convert >50% of fed L-tyrosine to caffeic acid (SI Figure S1), which  
230 indicates that it should be able to produce high amounts of caffeic acid in a tyrosine-  
231 producer strain.

## 232 Discussion

233 Building microbial cell factories for the production of plant polyphenols has been a major  
234 goal for metabolic engineers over the last decade [43, 44]. The low abundance of these  
235 compounds and their occurrence in complex mixtures of variable composition in plants,  
236 makes recombinant microbial cell factories an attractive source for industrial  
237 applications. However, the strict regulation of the aromatic amino acid metabolism,  
238 which provides precursors to most recombinant polyphenol-producing pathways, limits  
239 the overall pathway efficiency. For recombinant polyphenol-producing pathways in

240 *E.coli*, it has been observed that overcoming the precursor bottleneck by metabolic  
241 engineering of the aromatic amino acid pathway, often reveals bottlenecks further down  
242 the recombinant pathway [45–47]. Therefore, it is crucial to optimize the recombinant  
243 pathway itself before moving into a microbial chassis with deregulated aromatic amino  
244 acid production. In this study, we optimized the two-step conversion of L-tyrosine to  
245 caffeic acid. Here it is important to ensure high efficiency of the second pathway step to  
246 avoid accumulation of *p*-coumaric acid, which has been shown to severely inhibit the  
247 activity of the first pathway enzyme, TAL [27]. The three strategies we tested focused  
248 on the electron-donating redox partners rather than the Cytochrome P450 enzyme itself.  
249 Previous *in vitro* studies of this particular Cytochrome P450 and others have shown that  
250 the right choice of redox system, in particular the ferredoxin, is crucial for efficient  
251 electron transfer and enzyme catalysis [29, 33]. As expected, we observed the highest  
252 caffeic acid titers with the natural redox system composed of Pux and PuR in the one-  
253 step conversion with untethered redox partners. However, when we applied tethering  
254 strategies to increase the affinity of the Cytochrome P450 and the redox partners  
255 towards each other, we observed higher titers with the non-natural redox partners.  
256 Tethering strategies have previously been applied to several Cytochrome P450  
257 enzymes, both *in vitro* [35, 42, 48–51] and *in vivo* [42, 48]. The *in vitro* studies showed  
258 that tethered redox complexes are able to overcome the need to use an excess of redox  
259 partners over the Cytochrome P450 enzyme, to compensate for low protein-protein  
260 affinities (typically a five- to twenty-fold molar excess of ferredoxin is used *in vitro*).  
261 Furthermore, kinetic studies showed that at low enzyme concentrations, the tethered  
262 complexes outperform the 1:1:1 mixtures of free enzymes. These reports and our

263 findings for our versions of the PUPPET tether indicate that tethering strategies in  
264 whole-cell catalysis may be particularly useful in two scenarios: (A) if the expression  
265 levels of the Cytochrome P450 and redox partners are low (poor protein expression,  
266 expression from genomic gene copies or as part of a multi-enzyme recombinant  
267 pathway), or (B) if the natural redox partners are unknown and surrogate systems are  
268 used to reconstitute the Cytochrome P450 activity.

269 To our knowledge, this study is the first one to use the PUPPET tether in whole-cell  
270 catalysis and also the first one to use any of the known Cytochrome P450 tethers in the  
271 context of a recombinant pathway. In the caffeic acid pathway, the tethered Cytochrome  
272 P450 complexes were slightly outperformed by the free, natural redox complex, in  
273 particular in the presence of extra copies of the *pux* gene (s18). This may indicate that  
274 the metabolic burden of expressing the PCNA subunits in addition to the pathway  
275 enzymes and the three resistance genes required for plasmid maintenance represents a  
276 disadvantage of the strains expressing the tethered Cytochrome P450 complexes  
277 compared to the ones expressing the free, natural redox complex (s15 and s18). The  
278 fact that s18 outperforms s15 indicates that the availability of Pux is limiting in s15, and  
279 is in good agreement with observations made in other whole-cell conversions [52, 53].  
280 Since our strategy only doubled the gene dose of *pux*, it is very well possible that  
281 rearranging the genes in the vector system to achieve higher protein levels of Pux  
282 relative to the other enzymes could lead to even better results than described in this  
283 study. Our optimization efforts of the second pathway step in combination with the use  
284 of FjTAL for the first pathway step, enabled us to demonstrate the *de novo* production of  
285 caffeic acid in an otherwise wild type *E. coli* background. FjTAL had previously been

286 seen to be beneficial for the production of *p*-coumaric acid and its derivatives in other  
287 microbes [11, 54, 55], however, to our knowledge it has not been used in *E. coli*. It  
288 appears that this enzyme allows for a more efficient routing of L-tyrosine into the caffeic  
289 acid pathway than RgTAL at low L-tyrosine concentrations. Under high L-tyrosine  
290 conditions, at levels that we would expect in tyrosine producer strains [56], our  
291 fermentation strains expressing FjTAL achieve slightly higher caffeic acid titers than the  
292 strains expressing RgTAL and lower titers of *p*-coumaric acid. This indicates that the  
293 optimized pathway is more balanced so that less *p*-coumaric acid accumulates but  
294 overall less L-tyrosine is converted into *p*-coumaric acid. To further improve these  
295 results, it is necessary to investigate the stability and activity of the FjTAL enzyme over  
296 time, since it appears to be inactive after 48h of fermentation.

## 297 Conclusions

298 In this study we established *de novo* synthesis of caffeic acid by expressing tyrosine  
299 ammonia lyase from *Flavobacterium johnsoniae* and CYP199A2 F185L N<sup>7</sup> from  
300 *Rhodopseudomonas palustris* with its redox partners palustrisredoxin and  
301 palustrisredoxin reductase. We found that compared to earlier versions of this pathway,  
302 changes made to the redox partners, namely the use of palustrisredoxin reductase  
303 instead of putidaredoxin reductase and the duplication of the palustrisredoxin gene  
304 dose, as well as the use of FjTAL instead of RgTAL, enhanced the pathway  
305 performance under low L-tyrosine conditions as encountered in otherwise wild type *E.*  
306 *coli*. Furthermore, we observed that applying a tethering strategy to the Cytochrome  
307 P450-catalyzed pathway step based on the PUPPET system [35] increases caffeic acid  
308 titers in strains expressing non-natural redox systems. This indicates that this strategy

309 can be useful for pathways containing orphan bacterial Cytochromes P450. The  
310 optimized caffeic acid pathway could now be transferred into a tyrosine-producer *E. coli*  
311 strain for more in-depth characterization or process engineering.

## 312 Materials and Methods

### 313 Bacterial strains and plasmids

314 All molecular cloning and plasmid propagation steps were performed in chemically  
315 competent *Escherichia coli* *E. coli*® 10G (F- *mcrA*  $\Delta$ (*mrr-hsdRMS-*  
316 *mcrBC)* *endA1 recA1*  $\Phi$ 80*dlacZ* $\Delta$ M15  $\Delta$ *lacX74 araD139*  
317  $\Delta$ (*ara,leu*)7697*galU galK rpsL nupG*  $\lambda$ -*tonA*) produced by Lucigen (Middleton, WI,  
318 USA). Gene expression under the control of T7 promoters was performed in *E. coli* K-12  
319 MG1655(DE3) [57]. Plasmids were constructed with a range of strategies summarized  
320 in the Supplementary Information (SI) Table S2. All genes in the final constructs were  
321 fully sequenced (Eton Bioscience, Charlestown, MA). The FjTAL, SeSam8 and PCNA1-  
322 PdR genes were codon optimized for *E. coli* and synthesized as gblocks® gene  
323 fragments by Integrated DNA Technologies (Coralville, IA, USA) (sequence provided in  
324 SI). Plasmids pHSG-PCNA2 and pHSG-PCNA3 were a gift from Teruyuki Nagamune  
325 obtained through Addgene (Cambridge, MA, USA) (Addgene plasmid # 66126;  
326 <http://n2t.net/addgene:66126>; RRID:Addgene\_66126) and (Addgene plasmid # 66127;  
327 <http://n2t.net/addgene:66127>; RRID:Addgene\_66127) [35]. Plasmid pACYCDuet-  
328 PuR/Pux was a gift from Dr. Stephen G. Bell (University of Adelaide, Australia). The  
329 construction of plasmids IR54 and IR64 is described in Rodrigues et al 2015 [18].  
330 The peptide linkers connecting the PCNA subunits with the respective enzymes were  
331 designed based on the optimized linkers described in Haga et al. 2013 [39] (tether

332 design I: PCNA1-(GGGS)<sub>2</sub>-FdR, PCNA2-GGGSP<sub>20</sub>G-Fdx, PCNA3-GGS-Cytochrome  
333 P450; tether design II: PCNA1-GGS-Cytochrome P450, PCNA2-GGGSP<sub>20</sub>G-Fdx,  
334 PCNA3-(GGGS)<sub>2</sub>-FdR).

### 335 Fermentation

336 Plasmids and strains used in fermentations are described in Table 1 and Table 2,  
337 respectively. *E. coli* K-12 MG1655(DE3) made chemically competent according to the  
338 protocol by Inoue et al [58] was sequentially transformed with appropriate plasmids. The  
339 correct identity of strains was confirmed by colony PCR. Starter cultures were prepared  
340 from three individual colonies of the final strains in 5 mL Lysogeny broth (LB)  
341 supplemented with carbenicillin (100 µg/mL), spectinomycin (50 µg/mL) and kanamycin  
342 (50 µg/mL, only s01-s03 and s13-s18) in round-bottom polystyrene tubes, incubated  
343 over night at 37°C with agitation and used to inoculate the main cultures (7 mL LB with  
344 antibiotics; round-bottom polystyrene tubes). After 4 h of growth at 37°C, 250 rpm,  
345 OD<sub>600</sub> was measured and the appropriate volume of each culture pelleted and  
346 resuspended in modified, selective M9 including substrates and 4% glucose to obtain  
347 15 mL cultures at OD<sub>600</sub> of 0.7 or 20 mL cultures at OD<sub>600</sub> of 0.5 to 0.7 (time course  
348 experiment) in sterile glass tubes. These cultures were incubated at 26°C, 160 rpm for  
349 72 h or 96 h (time course experiment). For the time course experiment samples of 1000  
350 µL were taken every 24 h, for all other experiments samples of 2000 µL were taken  
351 after 72 h and either stored at -20°C until further processing or extracted with ethyl  
352 acetate immediately.

353 M9 medium composition (1x) prepared from sterile stocks: M9 salts (Millipore-Sigma,  
354 used as 5x stock), Trace Mineral Supplement (ATCC® MD-TMS™, used as 200x  
355 stock), vitamin mix (from 100x stock; final: riboflavin 0.84 mg/L, folic acid 0.084 mg/L,



356 nicotinic acid 12.2 mg/L, pyridoxine 2.8 mg/L, and pantothenic acid 10.8 mg/L), biotin  
357 (from 1000x stock; final: 0.24 mg/L), thiamine (from 1470x stock; final: 340 mg/L),  $\delta$ -  
358 Aminolevulinic acid (from 1000x stock in MeOH, final: 7.5  $\mu$ g/mL), IPTG (from 1000x  
359 stock, final: 1 mM), aTc (from 1000x stock, final: 100 ng/mL; only included in  
360 fermentations of s01-s03), carbenicillin (from 1000x stock, final: 100  $\mu$ g/mL),  
361 spectinomycin (from 1000x stock, final: 50  $\mu$ g/mL), kanamycin (from 1000x stock, final:  
362 50  $\mu$ g/mL, only strains s01-s03 and s13-s18), 4% (w/v) glucose (from 50% w/v stock).  
363 Optional: *p*-coumaric acid (from fresh 100x stock in MeOH, final 3 mM) or L-tyrosine  
364 (from fresh 100x stock in 1M HCl).

#### 365 **Product extraction**

366 The samples were acidified with 6N HCl (pH<3) and split into two tubes as technical  
367 duplicates. Samples were extracted twice with equal volumes of ethylacetate. The  
368 organic phases of both extraction steps were combined and evaporated under a stream  
369 of air or nitrogen. The dried material was resuspended in 100  $\mu$ L Acetonitrile with 0.1%  
370 Trifluoroacetic acid (10x concentrated compared to culture) or 80  $\mu$ L Acetonitrile with  
371 0.1% Trifluoroacetic acid (5x concentrated compared to culture) for the time course  
372 experiment. Samples were transferred into HPLC vials with conical glass inserts and  
373 analyzed by HPLC.

#### 374 **HPLC analysis**

375 10  $\mu$ L of the samples were analyzed by reversed-phase HPLC (instrument: Agilent  
376 1100, column: Agilent Zorbax Eclipse XDB-C18 80 $\text{\AA}$ , 4.6 x 150 mm, 5 $\mu$ m; detector:  
377 Agilent diode array detector G1315B,  $\lambda$ =310nm, gradient: 10% to 20% Acetonitrile with  
378 0.1% Trifluoroacetic acid over 17 min. The *p*-coumaric acid and caffeic acid peaks were  
379 identified by comparing the retention times to authentic standards and by mass

380 spectrometry (Agilent G6120, quadrupole MS). The integrated peak areas were  
381 converted to concentrations in mM based on calibration curves generated with authentic  
382 standards.

### 383 [List of abbreviations](#)

384 FdR – ferredoxin reductase

385 Fdx – ferredoxin

386 FjTAL – *F. johnsoniae* tyrosine ammonia lyase

387 PdR – *P. putida* putidaredoxin reductase

388 Pdx – *P. putida* putidaredoxin

389 PCNA - Proliferating Cell Nuclear Antigen = heterotrimeric DNA sliding clamp; used as  
390 tether

391 p. i. – post induction

392 PuR – *R. palustris* palustrisredoxin reductase

393 Pux – *R. palustris* palustrisredoxin

394 RgTAL – *R. glutinis* tyrosine ammonia lyase

395 TAL – tyrosine ammonia lyase

### 396 [Declarations](#)

397 [Ethics approval and consent to participate](#)

398 Not applicable.

399 [Consent for publication](#)

400 Not applicable.

#### 401 [Availability of data and materials](#)

402 The datasets used and/or analyzed during the current study are available from the  
403 corresponding author on reasonable request.

#### 404 [Competing interests](#)

405 The authors declare that they have no competing interests.

#### 406 [Funding](#)

407 K.H. is supported by the Human Frontier Science Program (Grant Number  
408 LT000969/2016-L). Research was supported by the MIT Portugal Program (Grant  
409 Number 6937822).

#### 410 [Authors' contributions](#)

411 K.H. conceived the study and wrote the manuscript with support and guidance by  
412 K.L.J.P. K.H. performed and analyzed the experiments.

#### 413 [Acknowledgements](#)

414 K.H. and K.L.J.P. are grateful to Dr. Stephen G. Bell (University of Adelaide, Australia)  
415 for plasmid pACYCDuet::PuR\_Pux, and David Poberejsky for assistance with cloning.  
416 K.H. is grateful for the support by the Human Frontier Science Program (Grant Number  
417 LT000969/2016-L). This work was supported by the MIT Portugal Program (Grant  
418 Number 6937822).

#### 419 [References](#)

- 420 1. Takeda H, Tsuji M, Inazu M, Egashira T, Matsumiya T. Rosmarinic acid and caffeic  
421 acid produce antidepressive-like effect in the forced swimming test in mice. *European*  
422 *Journal of Pharmacology*. 2002;449:261–7. doi:10.1016/S0014-2999(02)02037-X.
- 423 2. Jung UJ, Lee M-K, Park YB, Jeon S-M, Choi M-S. Antihyperglycemic and antioxidant

- 424 properties of caffeic acid in db/db mice. *The Journal of pharmacology and experimental*  
425 *therapeutics*. 2006;318:476–83. doi:10.1124/jpet.106.105163.
- 426 3. Chao P-C, Hsu C-C, Yin M-C. Anti-inflammatory and anti-coagulatory activities of  
427 caffeic acid and ellagic acid in cardiac tissue of diabetic mice. *Nutrition & metabolism*.  
428 2009;6:33. doi:10.1186/1743-7075-6-33.
- 429 4. Mori H, Iwahashi H. Antioxidant Activity of Caffeic Acid through a Novel Mechanism  
430 under UVA Irradiation. *Journal of Clinical Biochemistry and Nutrition*. 2009;45:49–55.
- 431 5. Rajendra Prasad N, Karthikeyan A, Karthikeyan S, Venkata Reddy B. Inhibitory effect  
432 of caffeic acid on cancer cell proliferation by oxidative mechanism in human HT-1080  
433 fibrosarcoma cell line. *Molecular and Cellular Biochemistry*. 2011;349:11–9.  
434 doi:10.1007/s11010-010-0655-7.
- 435 6. Yamasaki H, Tsujimoto K, Uozaki M, Nishide M, Suzuki Y, Koyama AH, et al.  
436 Inhibition of multiplication of herpes simplex virus by caffeic acid. *International Journal*  
437 *of Molecular Medicine*. 2011;28:595–8. doi:10.3892/ijmm.2011.739.
- 438 7. Rasmussen S, Dixon RA. Transgene-Mediated and Elicitor-Induced Perturbation of  
439 Metabolic Channeling at the Entry Point into the Phenylpropanoid Pathway. *The Plant*  
440 *Cell*. 1999;11:1537–52. doi:10.1105/tpc.11.8.1537.
- 441 8. Achnine L, Blancaflor EB, Rasmussen S, Dixon RA. Colocalization of L-  
442 Phenylalanine Ammonia-Lyase and Cinnamate 4-Hydroxylase for Metabolic Channeling  
443 in Phenylpropanoid Biosynthesis. *The Plant cell*. 2004;16:3098–109.  
444 doi:10.1105/tpc.104.024406.

- 445 9. Vogt T. Phenylpropanoid biosynthesis. *Molecular Plant*. 2010;3:2–20.  
446 doi:10.1093/mp/ssp106.
- 447 10. Wendisch VF, Kim Y, Lee J-H. Chemicals from lignin: Recent depolymerization  
448 techniques and upgrading extended pathways. *Current Opinion in Green and*  
449 *Sustainable Chemistry*. 2018;14:33–9. doi:10.1016/J.COGSC.2018.05.006.
- 450 11. Kallscheuer N, Vogt M, Stenzel A, Gätgens J, Bott M, Marienhagen J. Construction  
451 of a *Corynebacterium glutamicum* platform strain for the production of stilbenes and  
452 (2S)-flavanones. *Metabolic Engineering*. 2016;38:47–55.  
453 doi:10.1016/j.ymben.2016.06.003.
- 454 12. Kallscheuer N, Vogt M, Bott M, Marienhagen J. Functional expression of plant-  
455 derived O-methyltransferase, flavanone 3-hydroxylase, and flavonol synthase in  
456 *Corynebacterium glutamicum* for production of pterostilbene, kaempferol, and quercetin.  
457 *Journal of Biotechnology*. 2017;;1–7. doi:10.1016/j.jbiotec.2017.01.006.
- 458 13. Rodrigues JL, Araújo RG, Prather KLJ, Kluskens LD, Rodrigues LR. Production of  
459 curcuminoids from tyrosine by a metabolically engineered *Escherichia coli* using caffeic  
460 acid as an intermediate. *Biotechnology Journal*. 2015;10:599–609.  
461 doi:10.1002/biot.201400637.
- 462 14. Rodrigues JL, Couto MR, Araújo RG, Prather KLJ, Kluskens L, Rodrigues LR.  
463 Hydroxycinnamic acids and curcumin production in engineered *Escherichia coli* using  
464 heat shock promoters. *Biochemical Engineering Journal*. 2017;125:41–9.  
465 doi:10.1016/J.BEJ.2017.05.015.
- 466 15. Choi O, Wu C-Z, Kang SY, Ahn JS, Uhm T-B, Hong Y-S. Biosynthesis of plant-

467 specific phenylpropanoids by construction of an artificial biosynthetic pathway in  
468 *Escherichia coli*. Journal of Industrial Microbiology & Biotechnology. 2011;38:1657–65.  
469 doi:10.1007/s10295-011-0954-3.

470 16. Zhang H, Pereira B, Li Z, Stephanopoulos G. Engineering *Escherichia coli* coculture  
471 systems for the production of biochemical products. Proceedings of the National  
472 Academy of Sciences of the United States of America. 2015;112:8266–71.  
473 doi:10.1073/pnas.1506781112.

474 17. Kang S-Y, Choi O, Lee JK, Hwang BY, Uhm T-B, Hong Y-S. Artificial biosynthesis of  
475 phenylpropanoic acids in a tyrosine overproducing *Escherichia coli* strain. Microbial Cell  
476 Factories. 2012;11:1–9. doi:10.1186/1475-2859-11-153.

477 18. Rodrigues JL, Araújo RG, Prather KLJ, Kluskens LD, Rodrigues LR. Heterologous  
478 production of caffeic acid from tyrosine in *Escherichia coli*. Enzyme and Microbial  
479 Technology. 2015;71:36–44. doi:10.1016/j.enzmictec.2015.01.001.

480 19. Lin Y, Yan Y. Biosynthesis of caffeic acid in *Escherichia coli* using its endogenous  
481 hydroxylase complex. Microbial Cell Factories. 2012;11:42. doi:10.1186/1475-2859-11-  
482 42.

483 20. Huang Q, Lin Y, Yan Y. Caffeic acid production enhancement by engineering a  
484 phenylalanine over-producing *Escherichia coli* strain. Biotechnology and  
485 Bioengineering. 2013;110:3188–96. doi:10.1002/bit.24988.

486 21. Wang J, Mahajani M, Jackson SL, Yang Y, Chen M, Ferreira EM, et al. Engineering  
487 a bacterial platform for total biosynthesis of caffeic acid derived phenethyl esters and  
488 amides. Metabolic Engineering. 2017;44 September:89–99.

489 doi:10.1016/j.ymben.2017.09.011.

490 22. Furuya T, Kino K. Catalytic activity of the two-component flavin-dependent  
491 monooxygenase from *Pseudomonas aeruginosa* toward cinnamic acid derivatives.  
492 Applied Microbiology and Biotechnology. 2014;98:1145–54.

493 23. Kawaguchi H, Katsuyama Y, Danyao D, Kahar P, Nakamura-Tsuruta S, Teramura  
494 H, et al. Caffeic acid production by simultaneous saccharification and fermentation of  
495 kraft pulp using recombinant *Escherichia coli*. Applied Microbiology and Biotechnology.  
496 2017;101:5279–90. doi:10.1007/s00253-017-8270-0.

497 24. Furuya T, Arai Y, Kino K. Biotechnological production of caffeic acid by bacterial  
498 cytochrome P450 CYP199A2. Applied and Environmental Microbiology. 2012;78:6087–  
499 94.

500 25. Watts KT, Lee PC, Schmidt-Dannert C. Exploring Recombinant Flavonoid  
501 Biosynthesis in Metabolically Engineered *Escherichia coli*. ChemBioChem. 2004;5:500–  
502 7. doi:10.1002/cbic.200300783.

503 26. Li Y, Li J, Qian B, Cheng L, Xu S, Wang R. De Novo Biosynthesis of p-Coumaric  
504 Acid in *E. coli* with a trans-Cinnamic Acid 4-Hydroxylase from the Amaryllidaceae Plant  
505 *Lycoris aurea*. Molecules. 2018;23:3185.

506 27. Sariaslani FS. Development of a combined biological and chemical process for  
507 production of industrial aromatics from renewable resources. Annual review of  
508 microbiology. 2007;61:51–69.

509 28. Xue Z, McCluskey M, Cantera K, Ben-Bassat A, Sariaslani FS, Huang L. Improved

- 510 production of p-hydroxycinnamic acid from tyrosine using a novel thermostable  
511 phenylalanine/tyrosine ammonia lyase enzyme. *Enzyme and Microbial Technology*.  
512 2007;42:58–64.
- 513 29. Bell SG, McMillan JHC, Yorke J a., Kavanagh E, Johnson EOD, Wong L-L. Tailoring  
514 an alien ferredoxin to support native-like P450 monooxygenase activity. *Chemical*  
515 *Communications*. 2012;:11692–4.
- 516 30. Jendresen CB, Stahlhut SG, Li M, Gaspar P, Siedler S, Förster J, et al. Novel highly  
517 active and specific tyrosine ammonia-lyases from diverse origins enable enhanced  
518 production of aromatic compounds in bacteria and yeast. *Applied and Environmental*  
519 *Microbiology*. 2015; April. doi:10.1128/AEM.00405-15.
- 520 31. Hannemann F, Bichet A, Ewen KM, Bernhardt R. Cytochrome P450 systems--  
521 biological variations of electron transport chains. *Biochim Biophys Acta*.  
522 2007;1770:330–44. doi:10.1016/j.bbagen.2006.07.017.
- 523 32. Bell SG, Hoskins N, Xu F, Caprotti D, Rao Z, Wong L-L. Cytochrome P450 enzymes  
524 from the metabolically diverse bacterium *Rhodopseudomonas palustris*. *Biochemical*  
525 *and Biophysical Research Communications*. 2006;342:191–6.
- 526 33. Xu F, Bell SG, Peng Y, Johnson EOD, Bartlam M, Rao Z, et al. Crystal structure of a  
527 ferredoxin reductase for the CYP199A2 system from *Rhodopseudomonas palustris*.  
528 *Proteins*. 2009;77:867–80. doi:10.1002/prot.22510.
- 529 34. Dionne I, Nookala RK, Jackson SP, Doherty AJ, Bell SD. A heterotrimeric PCNA in  
530 the hyperthermophilic archaeon *Sulfolobus solfataricus*. *Molecular Cell*. 2003;11:275–  
531 82.



- 532 35. Hirakawa H, Nagamune T. Molecular assembly of P450 with ferredoxin and  
533 ferredoxin reductase by fusion to PCNA. *ChemBioChem*. 2010;11:1517–20.
- 534 36. Hirakawa H, Kakitani A, Nagamune T. Introduction of selective intersubunit disulfide  
535 bonds into self-assembly protein scaffold to enhance an artificial multienzyme complex's  
536 activity. *Biotechnology and Bioengineering*. 2013;110:1858–64.
- 537 37. Suzuki R, Hirakawa H, Nagamune T. Electron donation to an archaeal cytochrome  
538 P450 is enhanced by PCNA-mediated selective complex formation with foreign redox  
539 proteins. *Biotechnology Journal*. 2014;9:1573–81. doi:10.1002/biot.201400007.
- 540 38. Hirakawa H, Kamiya N, Tanaka T, Nagamune T. Intramolecular electron transfer in  
541 a cytochrome P450cam system with a site-specific branched structure. *Protein*  
542 *Engineering Design and Selection*. 2007;20:453–9. doi:10.1093/protein/gzm045.
- 543 39. Haga T, Hirakawa H, Nagamune T. Fine tuning of spatial arrangement of enzymes  
544 in a PCNA-mediated multienzyme complex using a rigid poly-L-proline linker. *PloS one*.  
545 2013;8:e75114. doi:10.1371/journal.pone.0075114.
- 546 40. Tan CY, Hirakawa H, Nagamune T. Supramolecular protein assembly supports  
547 immobilization of a cytochrome P450 monooxygenase system as water-insoluble gel.  
548 *Scientific Reports*. 2015;5:8648. doi:10.1038/srep08648.
- 549 41. Aoki M, Ishimori K, Fukada H, Takahashi K, Morishima I. Isothermal titration  
550 calorimetric studies on the associations of putidaredoxin to NADH-putidaredoxin  
551 reductase and P450cam. *Biochimica et Biophysica Acta (BBA) - Protein Structure and*  
552 *Molecular Enzymology*. 1998;1384:180–8. doi:10.1016/S0167-4838(98)00017-X.

- 553 42. Johnson EOD, Wong L-L. Partial fusion of a cytochrome P450 system by carboxy-  
554 terminal attachment of putidaredoxin reductase to P450cam (CYP101A1). *Catal Sci*  
555 *Technol.* 2016;6:7549–60. doi:10.1039/C6CY01042C.
- 556 43. Milke L, Aschenbrenner J, Marienhagen J, Kallscheuer N. Production of plant-  
557 derived polyphenols in microorganisms: current state and perspectives. *Applied*  
558 *Microbiology and Biotechnology.* 2018;102:1575–85. doi:10.1007/s00253-018-8747-5.
- 559 44. Hernández-Chávez G, Martínez A, Gosset G. Metabolic engineering strategies for  
560 caffeic acid production in *Escherichia coli*. *Electronic Journal of Biotechnology.*  
561 2019;38:19–26. doi:10.1016/J.EJBT.2018.12.004.
- 562 45. Santos CNS, Koffas M, Stephanopoulos G. Optimization of a heterologous pathway  
563 for the production of flavonoids from glucose. *Metabolic Engineering.* 2011;13:392–400.  
564 doi:10.1016/J.YMBEN.2011.02.002.
- 565 46. Wu J, Zhou T, Du G, Zhou J, Chen J. Modular Optimization of Heterologous  
566 Pathways for De Novo Synthesis of (2S)-Naringenin in *Escherichia coli*. *PLoS ONE.*  
567 2014;9:e101492. doi:10.1371/journal.pone.0101492.
- 568 47. Stahlhut SG, Siedler S, Malla S, Harrison SJ, Maury J, Neves AR, et al. Assembly of  
569 a novel biosynthetic pathway for production of the plant flavonoid fisetin in *Escherichia*  
570 *coli*. *Metabolic Engineering.* 2015;31:84–93. doi:10.1016/J.YMBEN.2015.07.002.
- 571 48. Sibbesen O, De Voss JJ, Montellano PR. Putidaredoxin reductase-putidaredoxin-  
572 cytochrome p450cam triple fusion protein. Construction of a self-sufficient *Escherichia*  
573 *coli* catalytic system. *The Journal of biological chemistry.* 1996;271:22462–9.  
574 doi:10.1074/jbc.271.37.22462.

- 575 49. Robin A, Roberts GA, Kisch J, Sabbadin F, Grogan G, Bruce N, et al. Engineering  
576 and improvement of the efficiency of a chimeric [P450cam-RhFRed reductase domain]  
577 enzyme. *Chemical Communications*. 2009;:2478. doi:10.1039/b901716j.
- 578 50. Bakkes PJ, Biemann S, Bokel A, Eickholt M, Girhard M, Urlacher VB. Design and  
579 improvement of artificial redox modules by molecular fusion of flavodoxin and flavodoxin  
580 reductase from *Escherichia coli*. *Scientific Reports*. 2015;5 July:12158.  
581 doi:10.1038/srep12158.
- 582 51. Bakkes PJ, Riehm JL, Sagadin T, Rühlmann A, Schubert P, Biemann S, et al.  
583 Engineering of versatile redox partner fusions that support monooxygenase activity of  
584 functionally diverse cytochrome P450s. *Scientific Reports*. 2017;7:9570.  
585 doi:10.1038/s41598-017-10075-w.
- 586 52. Bell SG, Tan ABH, Johnson EOD, Wong L-L, Guengerich FP, Isin EM, et al.  
587 Selective oxidative demethylation of veratric acid to vanillic acid by CYP199A4 from  
588 *Rhodopseudomonas palustris* HaA2. *Mol BioSyst*. 2009;6:206–14.  
589 doi:10.1039/B913487E.
- 590 53. Chao RR, De Voss JJ, Bell SG. The efficient and selective catalytic oxidation of  
591 para-substituted cinnamic acid derivatives by the cytochrome P450 monooxygenase,  
592 CYP199A4. *RSC Adv*. 2016;6:55286–97. doi:10.1039/C6RA11025H.
- 593 54. Rodriguez A, Kildegaard KR, Li M, Borodina I, Nielsen J. Establishment of a yeast  
594 platform strain for production of p-coumaric acid through metabolic engineering of  
595 aromatic amino acid biosynthesis. *Metabolic Engineering*. 2015;31:181–8.  
596 doi:10.1016/J.YMBEN.2015.08.003.

- 597 55. Rodriguez A, Strucko T, Stahlhut SG, Kristensen M, Svenssen DK, Forster J, et al.  
598 Metabolic engineering of yeast for fermentative production of flavonoids. *Bioresource*  
599 *Technology*. 2017;245:1645–54. doi:10.1016/j.biortech.2017.06.043.
- 600 56. Juminaga D, Baidoo EEK, Redding-Johanson AM, Batth TS, Burd H,  
601 Mukhopadhyay A, et al. Modular engineering of L-tyrosine production in *Escherichia*  
602 *coli*. *Applied and Environmental Microbiology*. 2012;78:89–98.
- 603 57. Nielsen DR, Yoon S-H, Yuan CJ, Prather KLJ. Metabolic engineering of acetoin and  
604 meso-2, 3-butanediol biosynthesis in *E. coli*. *Biotechnology journal*. 2010;5:274–84.  
605 doi:10.1002/biot.200900279.
- 606 58. Inoue H, Nojima H, Okayama H. High efficiency transformation of *Escherichia coli*  
607 with plasmids. *Gene*. 1990;96:23–8. doi:10.1016/0378-1119(90)90336-P.

## 608 Tables

609 Table 1: List of plasmids used in caffeic acid production strains.

| Plasmid name                                        | source     |
|-----------------------------------------------------|------------|
| IR54 pKVS45::PdR-Pux operon                         | [18]       |
| IR64 pCDFduet::_6His-CYP199A2 F185L NΔ7             | [18]       |
| c22 pRSFduet::6His-RgTAL                            | This study |
| c25 pCDFduet::_PCNA3-CYP199A2 F185L NΔ7             | This study |
| c28 pETduet::6His-PCNA2-Pux_PCNA1-PdR (opt)         | This study |
| c50 pETduet::6His-Pux_PdR (opt)                     | This study |
| c62 pETduet::6His-Pux_PuR                           | This study |
| c63 pETduet::6His-PCNA2-Pux_PCNA1-PuR               | This study |
| c71 pRSFduet::6His-FJTAL                            | This study |
| c72 pRSFduet::6His-SeSam8                           | This study |
| c84 pCDFduet::6His-Pux_6His-CYP199A2F185L NΔ7       | This study |
| c86 pETduet::6His-Pdx_PdR (opt)                     | This study |
| c88 pETduet::6His-PCNA2-Pdx_PCNA1-PdR(opt)          | This study |
| c96 pCDFduet::_PCNA1-GGS-CYP199A2 F185L NΔ7         | This study |
| c97 pETduet::6His-PCNA2-Pux_PCNA3-(GGGS)2-PdR (opt) | This study |
| c98 pETduet::6His-PCNA2-Pux_PCNA3-(GGGS)2-PuR       | This study |
| c106 pETduet::6His-PCNA2-Pdx_PCNA3-GGS-PdR (opt)    | This study |

610 Table 2: List of *E. coli* MG1655(DE3) strains used in fermentation experiments.

| identifier | Plasmid name                                                                                                       | source     |
|------------|--------------------------------------------------------------------------------------------------------------------|------------|
| s01        | IR64 pCDFduet:: <sub>6</sub> His-CYP199A2 F185L NΔ7<br>IR54 pKVS45::PdR-Pux operon<br>c22 pRSFduet::6His-RgTAL     | This study |
| s02        | IR64 pCDFduet:: <sub>6</sub> His-CYP199A2 F185L NΔ7<br>IR54 pKVS45::PdR-Pux operon<br>c71 pRSFduet::6His-FjTAL     | This study |
| s03        | IR64 pCDFduet:: <sub>6</sub> His-CYP199A2 F185L NΔ7<br>IR54 pKVS45::PdR-Pux operon<br>c72 pRSFduet::6His-SeSam8    | This study |
| s04        | IR64 pCDFduet:: <sub>6</sub> His-CYP199A2 F185L NΔ7<br>c50 pETduet::6His-Pux_PdR (opt)                             | This study |
| s05        | IR64 pCDFduet:: <sub>6</sub> His-CYP199A2 F185L NΔ7<br>c62 pETduet::6His-Pux_PuR                                   | This study |
| s06        | IR64 pCDFduet:: <sub>6</sub> His-CYP199A2 F185L NΔ7<br>c86 pETduet::6His-Pdx_PdR (opt)                             | This study |
| s07        | c25 pCDFduet::_PCNA3-CYP199A2 F185L NΔ7<br>c28 pETduet::6His-PCNA2-Pux_PCNA1-PdR (opt)                             | This study |
| s08        | c25 pCDFduet::_PCNA3-CYP199A2 F185L NΔ7<br>c63 pETduet::6His-PCNA2-Pux_PCNA1-PuR                                   | This study |
| s09        | c25 pCDFduet::_PCNA3-CYP199A2 F185L NΔ7<br>c88 pETduet::6His-PCNA2-Pdx_PCNA1-PdR (opt)                             | This study |
| s10        | c96 pCDFduet::_PCNA1-GGS-CYP199A2 F185L NΔ7<br>c97 pETduet::6His-PCNA2-Pux_PCNA3-(GGGS)2-PdR (opt)                 | This study |
| s11        | c96 pCDFduet::_PCNA1-GGS-CYP199A2 F185L NΔ7<br>c98 pETduet::6His-PCNA2-Pux_PCNA3-(GGGS)2-PuR                       | This study |
| s12        | c96 pCDFduet::_PCNA1-GGS-CYP199A2 F185L NΔ7<br>c106 pETduet::6His-PCNA2-Pdx_PCNA3-GGS-PdR (opt)                    | This study |
| s13        | IR64 pCDFduet::_CYP199A2 F185L NΔ7<br>c50 pETduet::6His-Pux_PdR (opt)<br>c22 pRSFduet::6His-RgTAL                  | This study |
| s14        | c25 pCDFduet::_PCNA3-CYP199A2 F185L NΔ7<br>c28 pETduet::6His-PCNA2-Pux_PCNA1-PdR (opt)<br>c71 pRSFduet::6His-FjTAL | This study |
| s15        | IR64 pCDFduet::_CYP199A2 F185L NΔ7<br>c62 pETduet::6His-Pux_PuR<br>c71 pRSFduet::6His-FjTAL                        | This study |
| s16        | c25 pCDFduet::_PCNA3-CYP199A2 F185L NΔ7<br>c63 pETduet::6His-PCNA2-Pux_PCNA1-PuR<br>c71 pRSFduet::6His-FjTAL       | This study |

|     |                                                                                                                                                                 |            |
|-----|-----------------------------------------------------------------------------------------------------------------------------------------------------------------|------------|
| s17 | c96 pCDFduet:: <sub>PCNA1</sub> -GGs-CYP199A2 F185L NΔ7<br>c106 pETduet:: <sub>6His-PCNA2-Pdx_PCNA3-GGS-PdR</sub> (opt)<br>c71 pRSFduet:: <sub>6His-FjTAL</sub> | This study |
| s18 | c84 pCDFduet:: <sub>6His-Pux_6His-CYP199A2F185L NΔ7</sub><br>c62 pETduet:: <sub>6His-Pux_PuR</sub><br>c71 pRSFduet:: <sub>6His-FjTAL</sub>                      | This study |

611 **Figure captions**

612 Figure 1: Aromatic amino acid anabolism and recombinant caffeic acid pathway with L-  
613 tyrosine as a branchpoint, and TAL and CYP199A2 F185L N<sup>7</sup> catalyzing the two  
614 pathway steps.

615  
616 Figure 2: Titters of *p*-coumaric acid and caffeic acid from glucose without (A) and with  
617 (B) L-Tyr supplementation (stacked histograms, error bars= standard deviation of  
618 biological replicates, n≥3).

619  
620 Figure 3: The choice of redox partners and tethering strategies for redox partners leads  
621 to higher caffeic acid titters from *p*-coumaric acid (panels A-C) and from glucose (panel  
622 D). A-C, caffeic acid titters from 3 mM *p*-coumaric acid 72 h p. i.: untethered/free redox  
623 partners (A), tether design I analogous to PUPPET [35] (B), tether design II (C).  
624 Stacked histograms of *p*-coumaric and caffeic acid titters after 72 h of fermentation for  
625 select strains expressing the two-step pathway (D). (Error bars= standard deviation of  
626 biological replicates, n≥3; Pictograms of tether designs: P450=Cytochrome P450  
627 enzyme, Fdx=ferredoxin (Pux or Pdx), FdR=ferredoxin reductase (PuR or PdR)).

628  
629 Figure 4: Duplication of the *pux* gene copy number further increases caffeic acid titters.  
630 Stacked histograms of *p*-coumaric and caffeic acid titters after 72 h of fermentation with  
631 glucose as the only carbon source for select strains expressing the two-step pathway  
632 (A). Titters plotted over time of a 96 h fermentation of s18 (B). (Error bars= standard  
633 deviation of biological replicates, n≥3.)



634 Figures

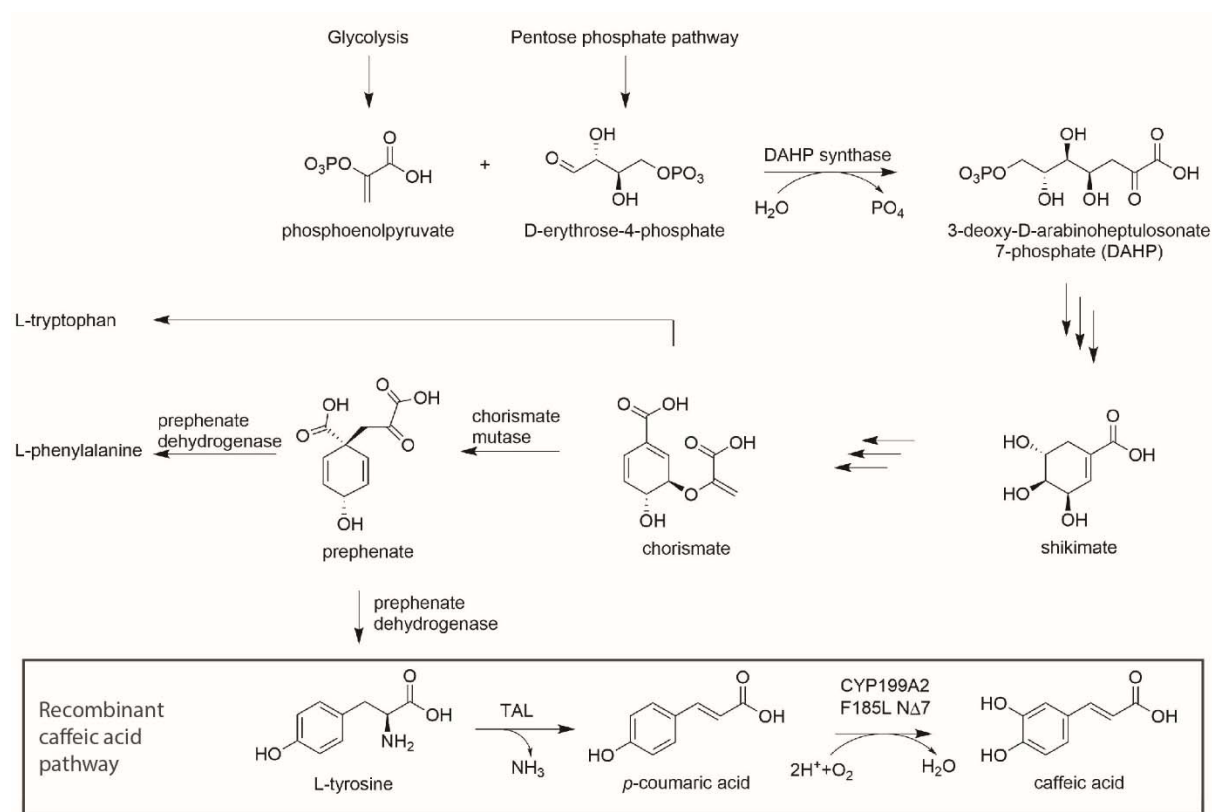

635

636 Figure 1

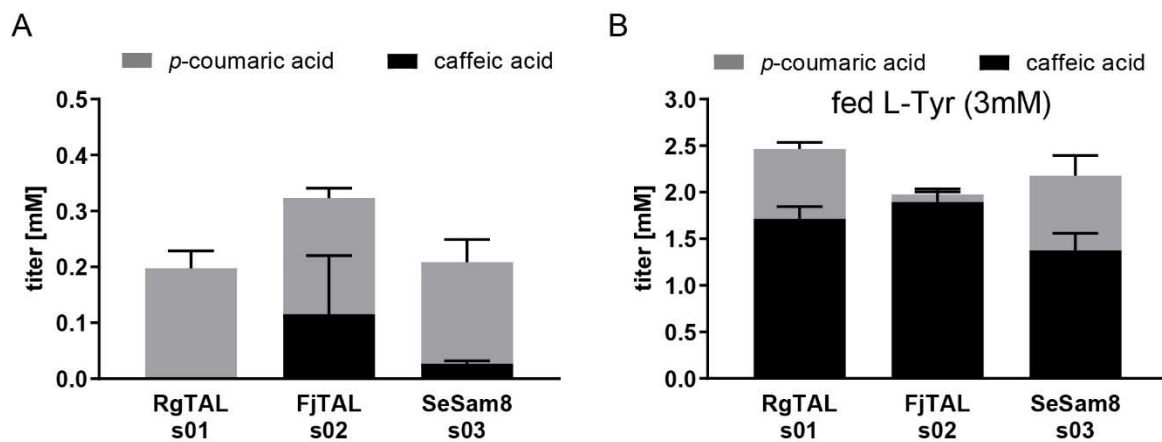

637

638 Figure 2

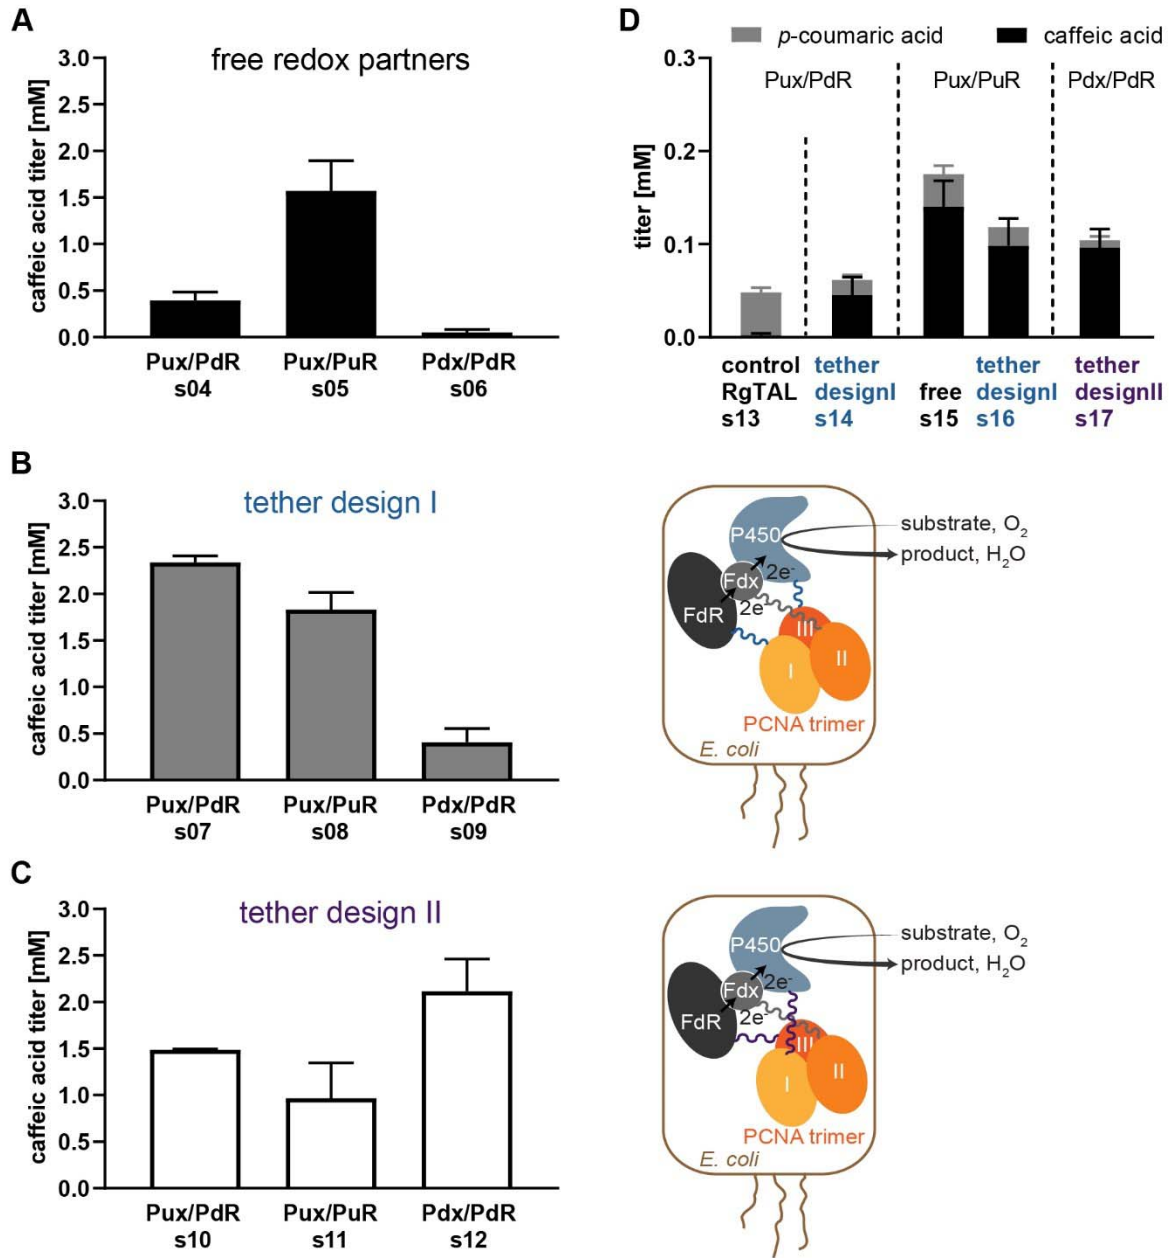

639

640 Figure 3

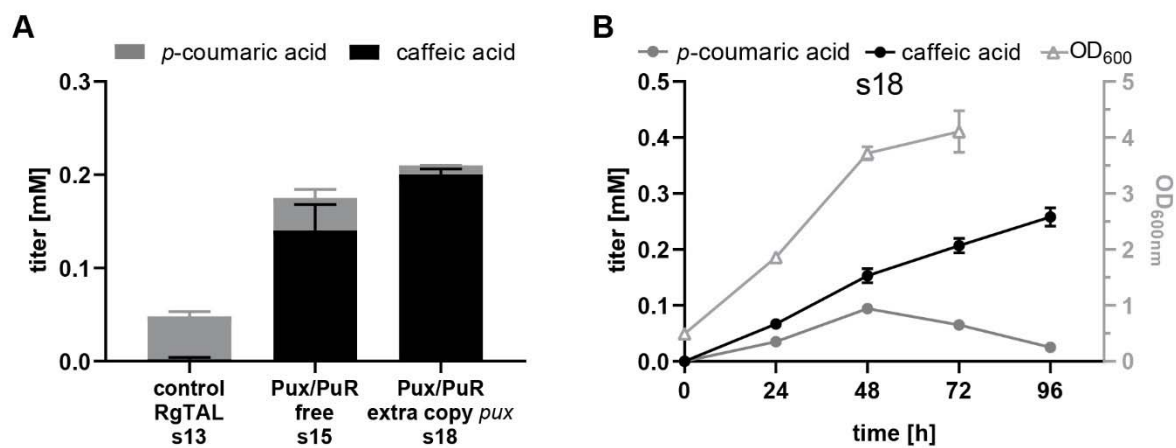

641

642 Figure 4
